# Supplementary material for: Bipartite Community Structure of eQTLs
Source: PubMed Central journal article supplement (PMC5019382; doi:10.1371/journal.pcbi.1005033), 2016-09-12
Supplement: pcbi.1005033.s015.pdf [file pcbi.1005033.s015.pdf]

| RsID       | hgnc_symbol | gwas.pval | network.gwas.fdr | regulome.score | SNP Community |
|------------|-------------|-----------|------------------|----------------|---------------|
| rs11012    | MAPK8IP1    | 4.40E-05  | 0.047394012      | 1f             | 39            |
| rs11012    | MAPT        | 4.40E-05  | 0.047394012      | 1f             | 39            |
| rs11012    | PLEKHM1     | 4.40E-05  | 0.047394012      | 1f             | 39            |
| rs11012    | LRRC37A2    | 4.40E-05  | 0.047394012      | 1f             | 39            |
| rs11012    | DND1        | 4.40E-05  | 0.047394012      | 1f             | 39            |
| rs12185268 | MAPK8IP1    | 5.38E-06  | 0.030303418      | 1f             | 39            |
| rs12185268 | MAPT        | 5.38E-06  | 0.030303418      | 1f             | 39            |
| rs12185268 | PLEKHM1     | 5.38E-06  | 0.030303418      | 1f             | 39            |
| rs12185268 | LRRC37A2    | 5.38E-06  | 0.030303418      | 1f             | 39            |
| rs12185268 | DND1        | 5.38E-06  | 0.030303418      | 1f             | 39            |
| rs1378358  | KANSL1      | 4.67E-05  | 0.047394012      | 7              | 39            |
| rs1378358  | MAPK8IP1    | 4.67E-05  | 0.047394012      | 7              | 39            |
| rs1378358  | MAPT        | 4.67E-05  | 0.047394012      | 7              | 39            |
| rs1378358  | LRRC37A2    | 4.67E-05  | 0.047394012      | 7              | 39            |
| rs1378358  | DND1        | 4.67E-05  | 0.047394012      | 7              | 39            |
| rs1396862  | KANSL1      | 3.71E-05  | 0.045358612      | 1f             | 39            |
| rs1396862  | MAPK8IP1    | 3.71E-05  | 0.045358612      | 1f             | 39            |
| rs1396862  | MAPT        | 3.71E-05  | 0.045358612      | 1f             | 39            |
| rs1396862  | PLEKHM1     | 3.71E-05  | 0.045358612      | 1f             | 39            |
| rs1396862  | LRRC37A2    | 3.71E-05  | 0.045358612      | 1f             | 39            |
| rs1396862  | DND1        | 3.71E-05  | 0.045358612      | 1f             | 39            |
| rs142167   | MAPK8IP1    | 3.08E-05  | 0.045358612      | 6              | 39            |
| rs142167   | MAPT        | 3.08E-05  | 0.045358612      | 6              | 39            |
| rs142167   | LRRC37A2    | 3.08E-05  | 0.045358612      | 6              | 39            |
| rs142167   | DND1        | 3.08E-05  | 0.045358612      | 6              | 39            |
| rs1635291  | MAPK8IP1    | 4.30E-05  | 0.047394012      | 6              | 39            |
| rs1635291  | MAPT        | 4.30E-05  | 0.047394012      | 6              | 39            |
| rs1635291  | PLEKHM1     | 4.30E-05  | 0.047394012      | 6              | 39            |
| rs1635291  | LRRC37A2    | 4.30E-05  | 0.047394012      | 6              | 39            |
| rs1635291  | DND1        | 4.30E-05  | 0.047394012      | 6              | 39            |
| rs169201   | KANSL1      | 5.51E-05  | 0.047394012      | 6              | 39            |
| rs169201   | MAPK8IP1    | 5.51E-05  | 0.047394012      | 6              | 39            |
| rs169201   | MAPT        | 5.51E-05  | 0.047394012      | 6              | 39            |
| rs169201   | LRRC37A2    | 5.51E-05  | 0.047394012      | 6              | 39            |
| rs169201   | DND1        | 5.51E-05  | 0.047394012      | 6              | 39            |
| rs16940665 | MAPK8IP1    | 3.07E-05  | 0.045358612      | 1f             | 39            |
| rs16940665 | MAPT        | 3.07E-05  | 0.045358612      | 1f             | 39            |
| rs16940665 | PLEKHM1     | 3.07E-05  | 0.045358612      | 1f             | 39            |
| rs16940665 | LRRC37A2    | 3.07E-05  | 0.045358612      | 1f             | 39            |
| rs16940665 | DND1        | 3.07E-05  | 0.045358612      | 1f             | 39            |
| rs17631676 | MAPK8IP1    | 1.18E-05  | 0.045358612      | 6              | 39            |
| rs17631676 | MAPT        | 1.18E-05  | 0.045358612      | 6              | 39            |

|            |          |          |             |    |    |
|------------|----------|----------|-------------|----|----|
| rs17631676 | PLEKHM1  | 1.18E-05 | 0.045358612 | 6  | 39 |
| rs17631676 | LRRC37A2 | 1.18E-05 | 0.045358612 | 6  | 39 |
| rs17631676 | DND1     | 1.18E-05 | 0.045358612 | 6  | 39 |
| rs17690703 | MAPK8IP1 | 2.70E-05 | 0.045358612 | 1b | 39 |
| rs17690703 | MAPT     | 2.70E-05 | 0.045358612 | 1b | 39 |
| rs17690703 | PLEKHM1  | 2.70E-05 | 0.045358612 | 1b | 39 |
| rs17690703 | LRRC37A2 | 2.70E-05 | 0.045358612 | 1b | 39 |
| rs17690703 | DND1     | 2.70E-05 | 0.045358612 | 1b | 39 |
| rs183211   | MAPK8IP1 | 3.03E-05 | 0.045358612 | 6  | 39 |
| rs183211   | MAPT     | 3.03E-05 | 0.045358612 | 6  | 39 |
| rs183211   | LRRC37A2 | 3.03E-05 | 0.045358612 | 6  | 39 |
| rs183211   | DND1     | 3.03E-05 | 0.045358612 | 6  | 39 |
| rs199436   | MAPK8IP1 | 3.37E-05 | 0.045358612 | 6  | 39 |
| rs199436   | MAPT     | 3.37E-05 | 0.045358612 | 6  | 39 |
| rs199436   | LRRC37A2 | 3.37E-05 | 0.045358612 | 6  | 39 |
| rs199436   | DND1     | 3.37E-05 | 0.045358612 | 6  | 39 |
| rs199438   | MAPK8IP1 | 2.93E-05 | 0.045358612 | 6  | 39 |
| rs199438   | MAPT     | 2.93E-05 | 0.045358612 | 6  | 39 |
| rs199438   | LRRC37A2 | 2.93E-05 | 0.045358612 | 6  | 39 |
| rs199438   | DND1     | 2.93E-05 | 0.045358612 | 6  | 39 |
| rs199442   | MAPK8IP1 | 3.34E-05 | 0.045358612 | 1f | 39 |
| rs199442   | MAPT     | 3.34E-05 | 0.045358612 | 1f | 39 |
| rs199442   | LRRC37A2 | 3.34E-05 | 0.045358612 | 1f | 39 |
| rs199442   | DND1     | 3.34E-05 | 0.045358612 | 1f | 39 |
| rs199444   | MAPK8IP1 | 3.33E-05 | 0.045358612 | 7  | 39 |
| rs199444   | MAPT     | 3.33E-05 | 0.045358612 | 7  | 39 |
| rs199444   | LRRC37A2 | 3.33E-05 | 0.045358612 | 7  | 39 |
| rs199444   | DND1     | 3.33E-05 | 0.045358612 | 7  | 39 |
| rs199448   | KANSL1   | 5.49E-05 | 0.047394012 | 6  | 39 |
| rs199448   | MAPK8IP1 | 5.49E-05 | 0.047394012 | 6  | 39 |
| rs199448   | MAPT     | 5.49E-05 | 0.047394012 | 6  | 39 |
| rs199448   | LRRC37A2 | 5.49E-05 | 0.047394012 | 6  | 39 |
| rs199448   | DND1     | 5.49E-05 | 0.047394012 | 6  | 39 |
| rs199449   | MAPK8IP1 | 3.29E-05 | 0.045358612 | 6  | 39 |
| rs199449   | MAPT     | 3.29E-05 | 0.045358612 | 6  | 39 |
| rs199449   | LRRC37A2 | 3.29E-05 | 0.045358612 | 6  | 39 |
| rs199449   | DND1     | 3.29E-05 | 0.045358612 | 6  | 39 |
| rs199451   | KANSL1   | 5.28E-05 | 0.047394012 | 5  | 39 |
| rs199451   | MAPK8IP1 | 5.28E-05 | 0.047394012 | 5  | 39 |
| rs199451   | MAPT     | 5.28E-05 | 0.047394012 | 5  | 39 |
| rs199451   | LRRC37A2 | 5.28E-05 | 0.047394012 | 5  | 39 |
| rs199451   | DND1     | 5.28E-05 | 0.047394012 | 5  | 39 |
| rs199452   | MAPK8IP1 | 3.03E-05 | 0.045358612 | 6  | 39 |

|           |          |          |             |    |    |
|-----------|----------|----------|-------------|----|----|
| rs199452  | MAPT     | 3.03E-05 | 0.045358612 | 6  | 39 |
| rs199452  | LRRC37A2 | 3.03E-05 | 0.045358612 | 6  | 39 |
| rs199452  | DND1     | 3.03E-05 | 0.045358612 | 6  | 39 |
| rs199454  | MAPK8IP1 | 3.53E-05 | 0.045358612 | 1f | 39 |
| rs199454  | MAPT     | 3.53E-05 | 0.045358612 | 1f | 39 |
| rs199454  | LRRC37A2 | 3.53E-05 | 0.045358612 | 1f | 39 |
| rs199454  | DND1     | 3.53E-05 | 0.045358612 | 1f | 39 |
| rs199456  | KANSL1   | 5.50E-05 | 0.047394012 | 1b | 39 |
| rs199456  | MAPK8IP1 | 5.50E-05 | 0.047394012 | 1b | 39 |
| rs199456  | MAPT     | 5.50E-05 | 0.047394012 | 1b | 39 |
| rs199456  | LRRC37A2 | 5.50E-05 | 0.047394012 | 1b | 39 |
| rs199456  | DND1     | 5.50E-05 | 0.047394012 | 1b | 39 |
| rs199457  | MAPK8IP1 | 5.61E-05 | 0.047394012 | 5  | 39 |
| rs199457  | MAPT     | 5.61E-05 | 0.047394012 | 5  | 39 |
| rs199457  | LRRC37A2 | 5.61E-05 | 0.047394012 | 5  | 39 |
| rs199457  | DND1     | 5.61E-05 | 0.047394012 | 5  | 39 |
| rs199501  | MAPK8IP1 | 3.13E-06 | 0.02644087  | 1f | 39 |
| rs199501  | MAPT     | 3.13E-06 | 0.02644087  | 1f | 39 |
| rs199501  | LRRC37A2 | 3.13E-06 | 0.02644087  | 1f | 39 |
| rs199501  | DND1     | 3.13E-06 | 0.02644087  | 1f | 39 |
| rs199520  | MAPK8IP1 | 1.75E-06 | 0.02644087  | 1f | 39 |
| rs199520  | MAPT     | 1.75E-06 | 0.02644087  | 1f | 39 |
| rs199520  | LRRC37A2 | 1.75E-06 | 0.02644087  | 1f | 39 |
| rs199520  | DND1     | 1.75E-06 | 0.02644087  | 1f | 39 |
| rs199530  | MAPK8IP1 | 5.97E-06 | 0.030303418 | 1f | 39 |
| rs199530  | MAPT     | 5.97E-06 | 0.030303418 | 1f | 39 |
| rs199530  | LRRC37A2 | 5.97E-06 | 0.030303418 | 1f | 39 |
| rs199530  | DND1     | 5.97E-06 | 0.030303418 | 1f | 39 |
| rs199533  | MAPK8IP1 | 1.81E-05 | 0.045358612 | 1d | 39 |
| rs199533  | MAPT     | 1.81E-05 | 0.045358612 | 1d | 39 |
| rs199533  | LRRC37A2 | 1.81E-05 | 0.045358612 | 1d | 39 |
| rs199533  | DND1     | 1.81E-05 | 0.045358612 | 1d | 39 |
| rs199536  | MAPK8IP1 | 5.14E-05 | 0.047394012 | 1d | 39 |
| rs199536  | MAPT     | 5.14E-05 | 0.047394012 | 1d | 39 |
| rs199536  | LRRC37A2 | 5.14E-05 | 0.047394012 | 1d | 39 |
| rs199536  | DND1     | 5.14E-05 | 0.047394012 | 1d | 39 |
| rs2074404 | MAPK8IP1 | 1.97E-05 | 0.045358612 | 1f | 40 |
| rs2074404 | MAPT     | 1.97E-05 | 0.045358612 | 1f | 40 |
| rs2074404 | LRRC37A2 | 1.97E-05 | 0.045358612 | 1f | 40 |
| rs2074404 | DND1     | 1.97E-05 | 0.045358612 | 1f | 40 |
| rs2074404 | STH      | 1.97E-05 | 0.045358612 | 1f | 40 |
| rs7224296 | MAPK8IP1 | 2.44E-06 | 0.02644087  | 6  | 39 |
| rs7224296 | MAPT     | 2.44E-06 | 0.02644087  | 6  | 39 |

|           |          |          |             |    |    |
|-----------|----------|----------|-------------|----|----|
| rs7224296 | LRRC37A2 | 2.44E-06 | 0.02644087  | 6  | 39 |
| rs7224296 | DND1     | 2.44E-06 | 0.02644087  | 6  | 39 |
| rs9268528 | HLA-DRB5 | 3.76E-05 | 0.045358612 | 1f | 33 |
| rs9268528 | HLA-DRA  | 3.76E-05 | 0.045358612 | 1f | 33 |
| rs9268528 | HLA-DRB4 | 3.76E-05 | 0.045358612 | 1f | 33 |







39

39

33

33

33
